# Supplementary material
Source: Springer Nature journal article supplement (https://www.springermedizin.de/resource/supplementary/13049_2009_153_MOESM4_ESM.pdf/9665990)

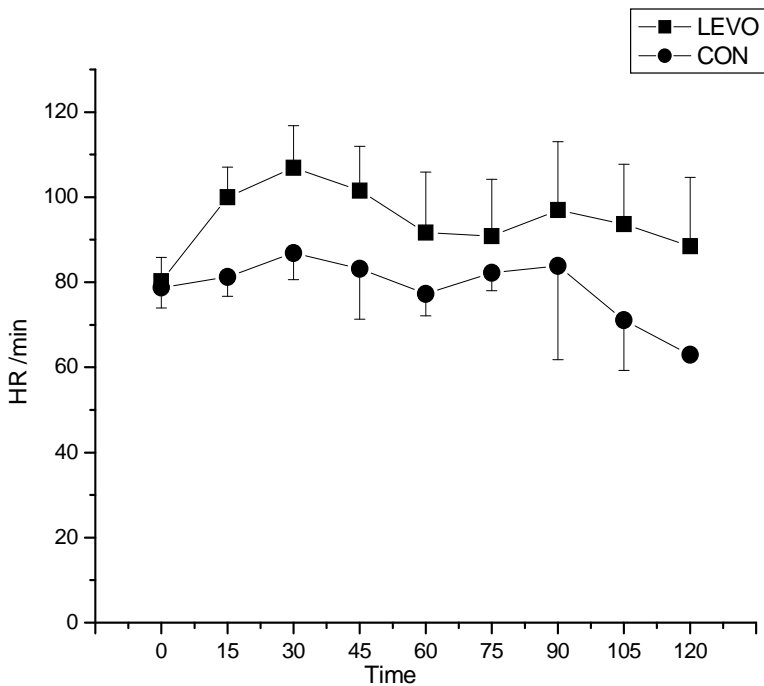

|         |   |   |   |   |   |   |   |   |   |
|---------|---|---|---|---|---|---|---|---|---|
| levo n= | 6 | 6 | 6 | 6 | 5 | 5 | 5 | 5 | 5 |
| con n=  | 6 | 6 | 5 | 5 | 4 | 3 | 3 | 1 | 1 |

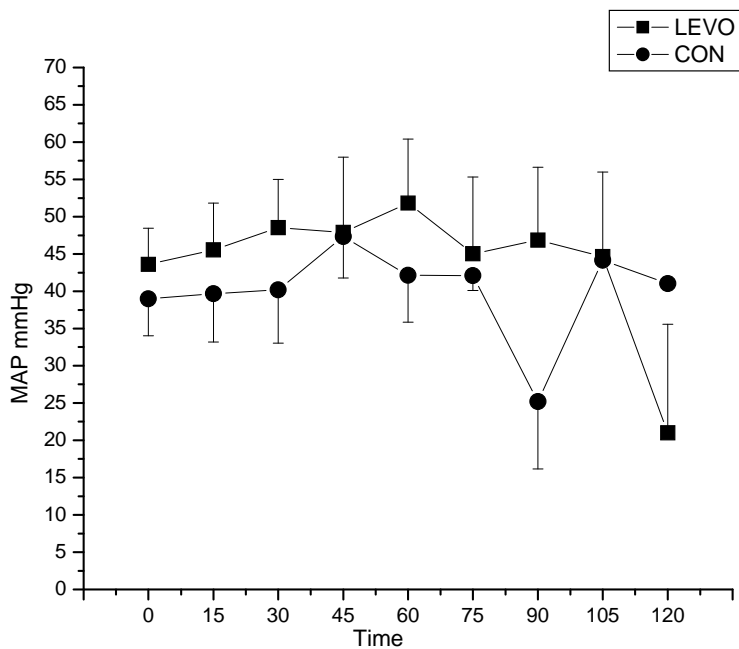

|         |   |   |   |   |   |   |   |   |   |
|---------|---|---|---|---|---|---|---|---|---|
| levo n= | 6 | 6 | 6 | 6 | 5 | 5 | 5 | 5 | 5 |
| con n=  | 6 | 6 | 5 | 5 | 4 | 3 | 3 | 1 | 1 |

Supplement: MOESM4 [file 9665990]
